# Supplementary material for: 4-Hydroxybenzoic Acid as an Antiviral Product from Alkaline Autoxidation of Catechinic Acid: A Fact to Be Reviewed
Source: MDPI journal article supplement (doi:10.3390/plants11141822), 2022-07-11
Supplement: s1 [file s1]

## Supplementary Materials

### 4-Hydroxybenzoic Acid as an Antiviral Product from Alkaline Autoxidation of Catechinic Acid: A Fact to Be Reviewed

Silvana Alfei <sup>1,\*</sup>, Debora Caviglia <sup>2,\*</sup>, Susanna Penco <sup>3</sup>, Guendalina Zuccari <sup>1</sup> and Fabio Gosetti <sup>4</sup>

- <sup>1.</sup> Department of Pharmacy (DIFAR), University of Genoa, Viale Cembrano, 4 - 16148 Genoa, Italy; [zuccari@difar.unige.it](mailto:zuccari@difar.unige.it) (G.Z.)
- <sup>2.</sup> Department of Surgical Sciences and Integrated Diagnostics (DISC), University of Genoa, Viale Benedetto XV, 6, 16132 Genoa, Italy
- <sup>3.</sup> Department of Experimental Medicine, University of Genoa, Via Leon Battista Alberti, 2 - 16132 Genoa (GE), Italy; [susanna.penco@unige.it](mailto:susanna.penco@unige.it) (S.P.)
- <sup>4.</sup> Department of Earth and Environmental Sciences (DISAT), University of Milano-Bicocca, Piazza della Scienza, 1 - 20126 Milano, Italy; [fabio.gosetti@unimib.it](mailto:fabio.gosetti@unimib.it) (F.G.)

\* Correspondence: [alfei@difar.unige.it](mailto:alfei@difar.unige.it); Tel.: +39 010 355 2296 (S.A.); [debora.caviglia@edu.unige.it](mailto:debora.caviglia@edu.unige.it) (D.C.)

**Table S1.** SRM NI transitions (Q1 and Q3 masses), dwell time, retention time ( $t_R$ ), and mass spectrometry parameters: Q1 Pre Bias, CE (Collision Energy), Q3 Pre Bias. The most three sensitive transitions for each species were monitored.

| Analytes     | Q1<br>( <i>m/z</i> ) | Q3<br>( <i>m/z</i> ) | Dwell time<br>(ms) | $t_R$<br>(min) | Q1 pre<br>Bias (V) | CE<br>(V) | Q3 pre Bias<br>(V) |
|--------------|----------------------|----------------------|--------------------|----------------|--------------------|-----------|--------------------|
| CA           | 289                  | 245/109/203          | 43                 | 0.87           | 11/30/15           | 15/19/27  | 11/20/10           |
| 4-HBA        | 137                  | 93/65/137            | 43                 | 1.86           | 10/10/10           | 20/27/10  | 13/11/14           |
| (+)-catechin | 289                  | 245/109/203          | 43                 | 1.98           | 14/16/11           | 16/24/19  | 11/10/13           |

Section S1. (+)-Catechin and Catechinic Acid (CA)

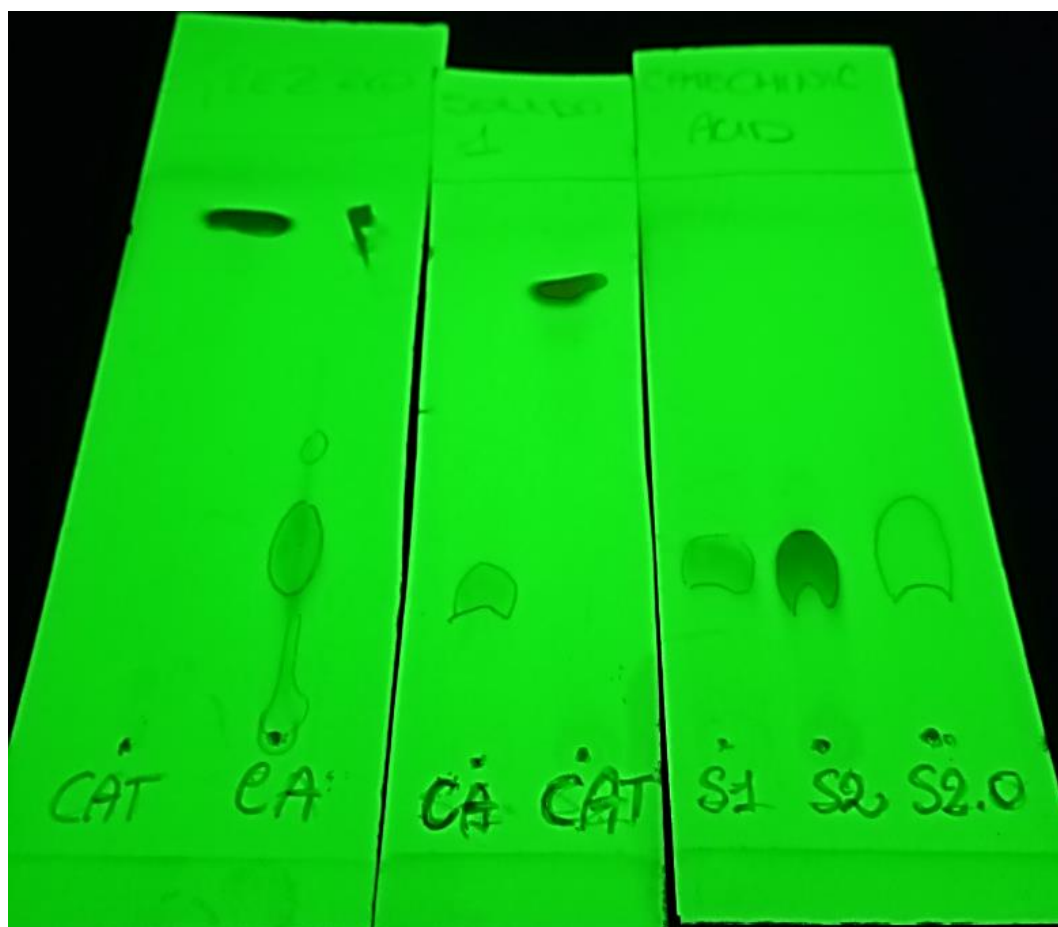

**Figure S1.** TLCs image observed at 254 nm (eluent ethyl acetate (EtOAc)/methanol (MeOH)/acetic acid (AcOH) 9/1/0.2 v/v/v). From the left: (+)-catechin (Rf. 0.82) and crude CA (Rf. 0.26); isolated CA and (+)-catechin; three samples of CA obtained by three different crystallizations from acetone/ethyl ether.

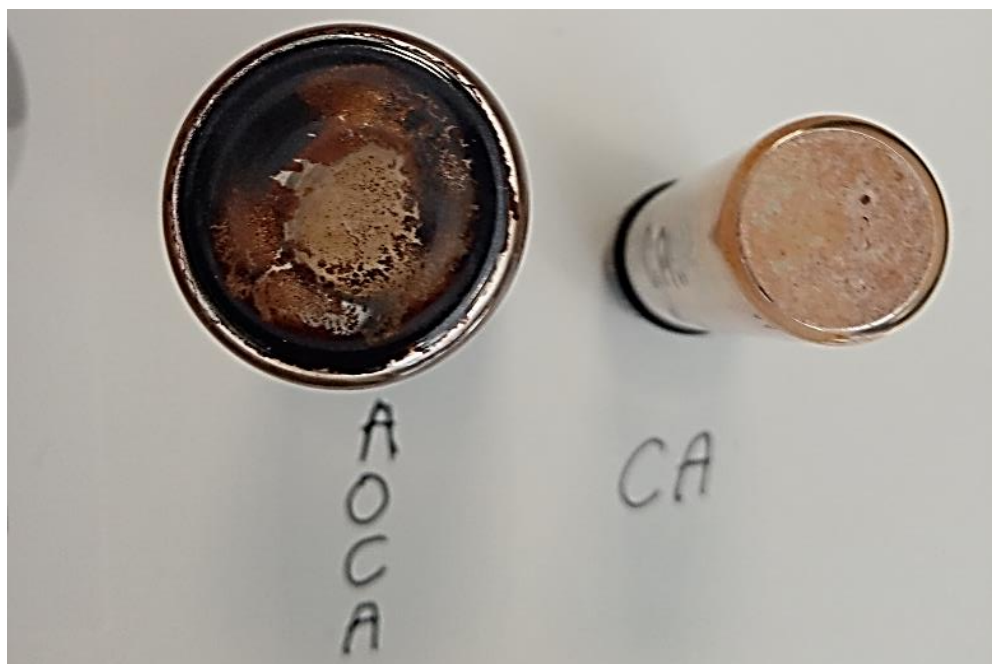

**Figure S2.** Aspect of the crystallized CA (right) and of the product of alkaline autooxidation of CA (AOCA).

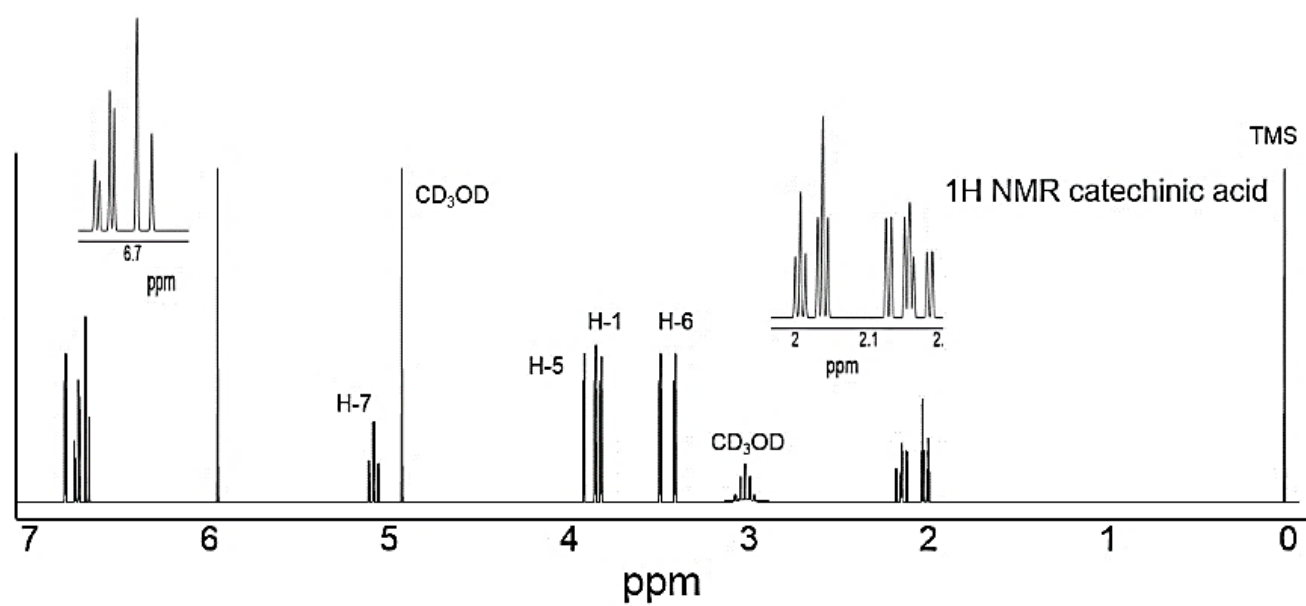

**Figure S3.**  $^1\text{H}$  NMR ( $\text{CD}_3\text{OD}$ , 400 MHz) spectrum of CA.

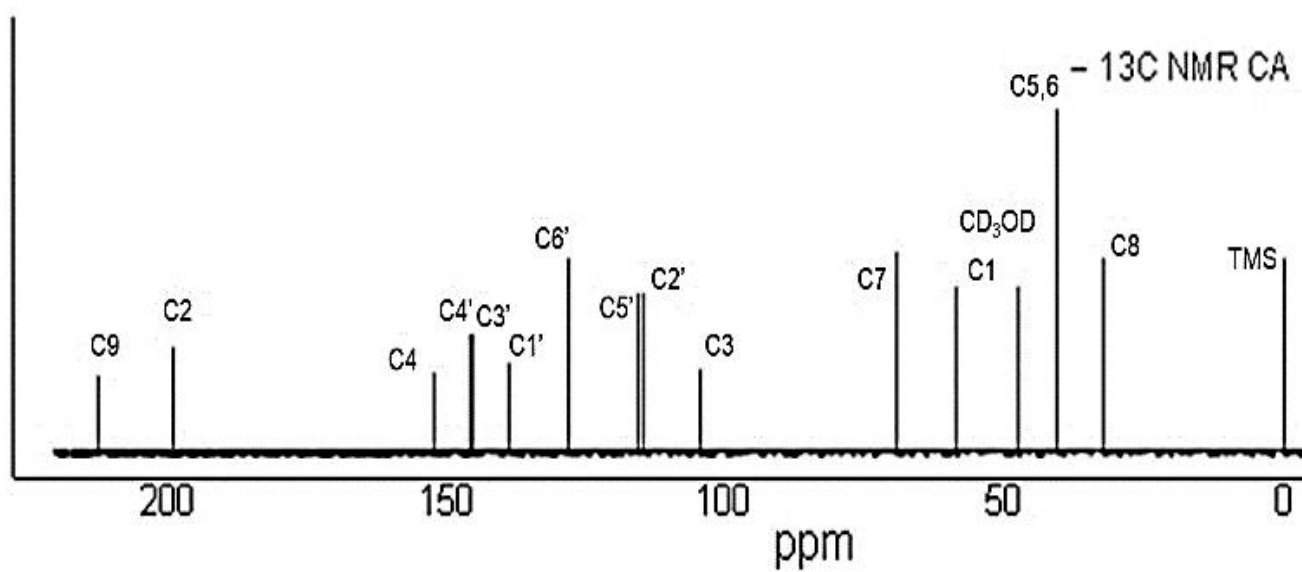

**Figure S4.** <sup>13</sup>C NMR (CD<sub>3</sub>OD, 100 MHz) spectrum of CA.

## Section S2. AOCA vs 4-HBA

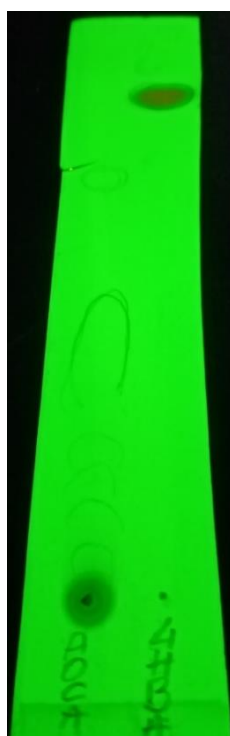

**Figure S5.** TLC analysis on AOCA and 4-HBA, taken as reference compound (detection at 254 nm) showing the absence of 4-HBA in AOCA.

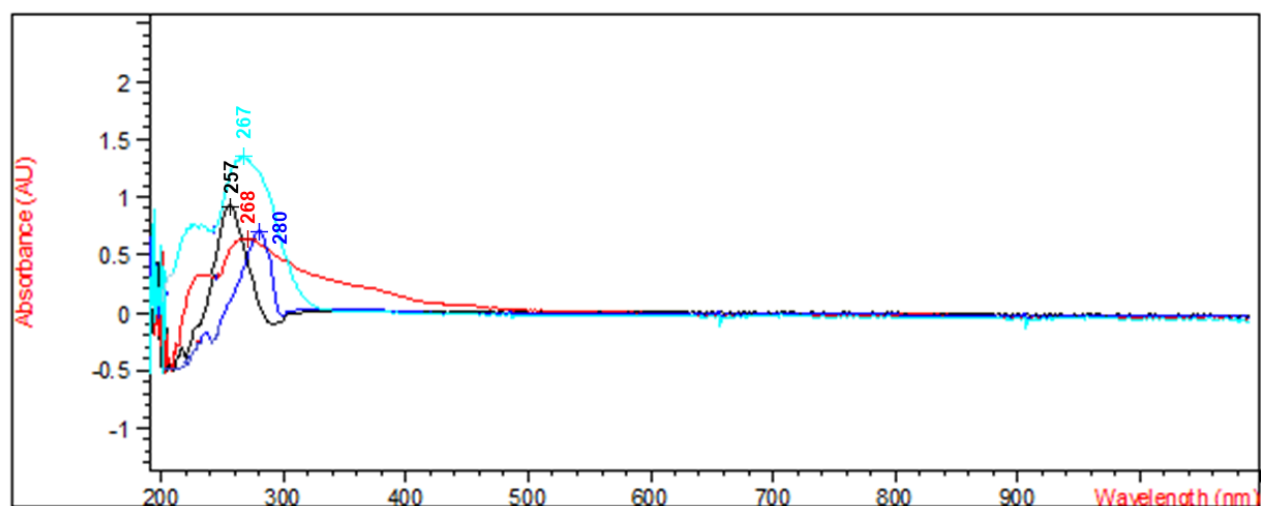

**Figure S6.** UV-Vis spectra of (+)-catechin (blue line), CA (light-blue line), AOCA (red line) and 4-HBA (black line).

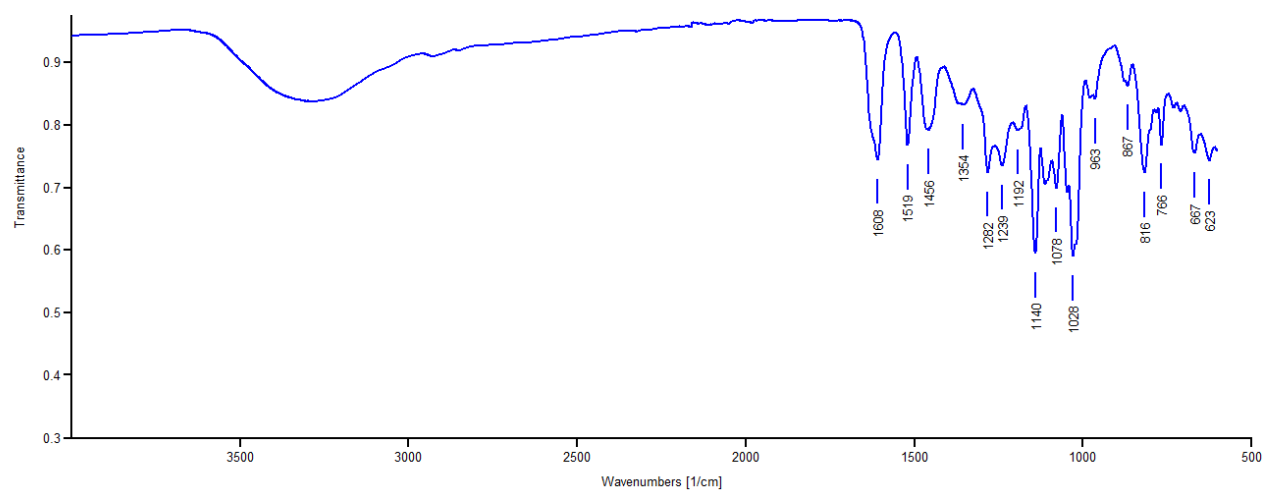

**Figure S7.** ATR-FTIR spectrum of (+)-catechin.

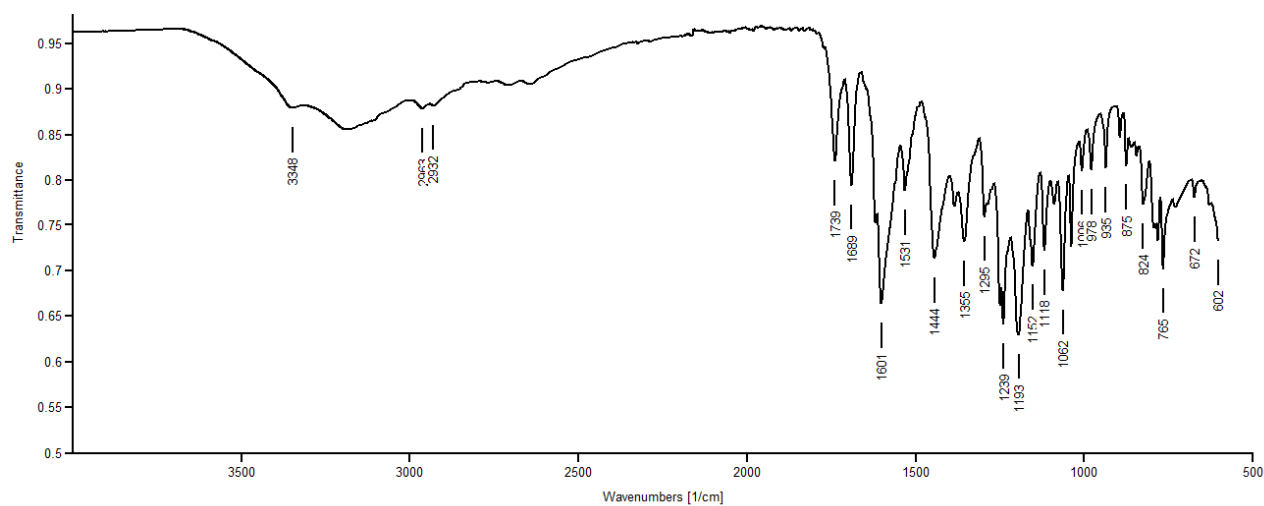

**Figure S8.** ATR-FTIR spectrum of CA.

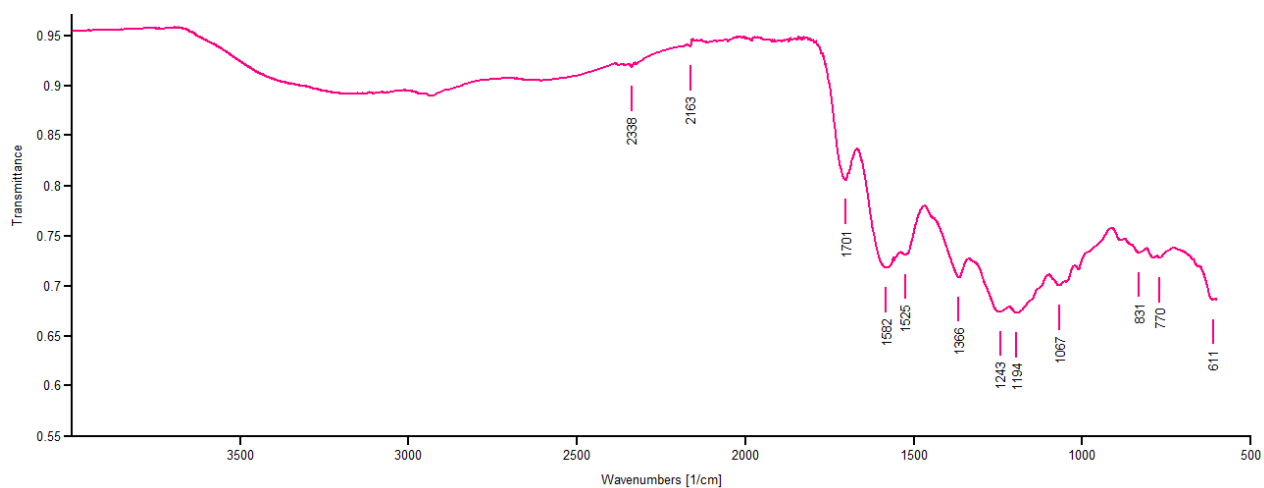

**Figure S9.** ATR-TFIR spectrum of AOCA.

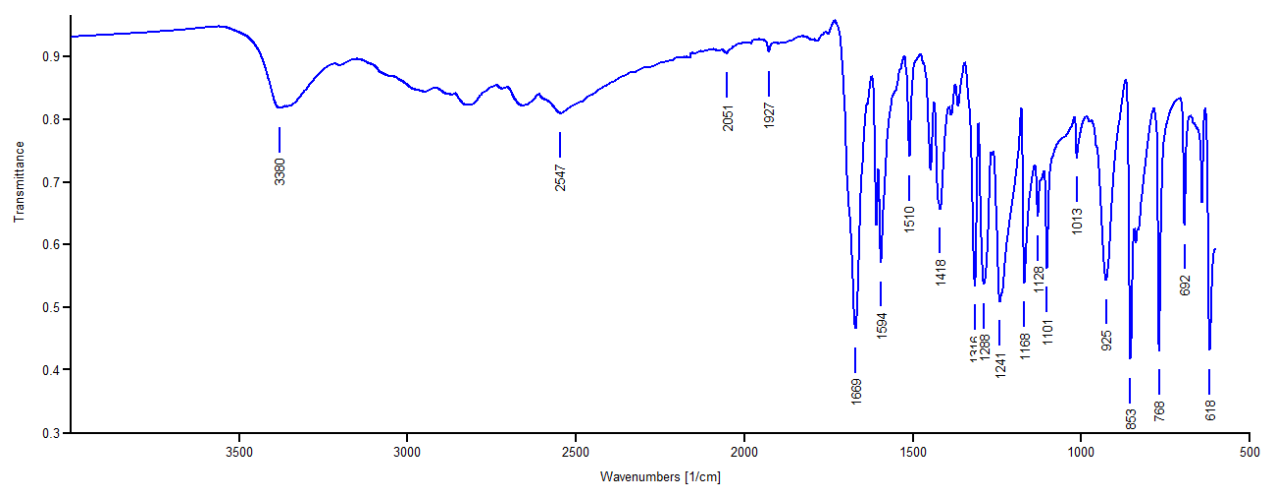

**Figure S10.** ATR-TFIR spectrum of 4-HBA.
